# Supplementary material for: Pyrolytic cavitation, selective adsorption and molecular recognition of a porous Eu(iii) MOF
Source: Royal Society of Chemistry journal article supplement (doi:10.1039/c4dt01434k), 2014-01-01
Supplement: c4dt01434k1.pdf [file c4dt01434k1.pdf]

## Supporting Information for manuscript

### Pyrolytic cavitation, selective adsorption and molecular recognition of a porous Eu(III) MOF

Wei-Ming Liao, Hua-Tian Shi, Xu-Hua Shi and Ye-Gao Yin\*

Department of Chemistry, Shantou University, Guangdong 515063, P. R.

China.

E-mail: ygyin@stu.edu.cn, 11wmliao@gmail.com

#### *Materials and Instruments*

All reagents and solvents were purchased from commercial sources and used without further purification. Thermogravimetric analyses (TGA) were carried out on a Q50 TGA (TA) thermal analysis equipment under a nitrogen flow of (40 mL/min<sup>-1</sup>) with a typical heating rate of 10°C/min<sup>-1</sup>. Infrared spectra (KBr pellet) were recorded on a Nicolet Avatar 360 spectrophotometer in the range of 4000-400 cm<sup>-1</sup>. Powder X-ray diffraction (PXRD) patterns of the samples were measured on a Bruker D8 Advance diffractometer (Cu K $\alpha$ ,  $\lambda = 1.5418\text{\AA}$ ) at room temperature. Gas adsorption isotherms of N<sub>2</sub>, CO<sub>2</sub>, H<sub>2</sub> and CH<sub>4</sub> were measured on the Micrometrics ASAP 2020 Surface Area and Porosity Analyzer. Elemental analyses of C, H, and N were determined with the instrument Elementar Vario EL III CHNS analyzer. UV-vis spectra of solvents were measured

with a Lambda 950 Spectrometer. Luminescence spectra were recorded on an Edinburgh Instruments FLS920 spectrofluorometer.

### ***Experimental Section***

#### **Synthesis of $[(\text{CH}_3)_2\text{NH}_2]^+@[\text{Eu}_2\text{L}_3(\text{HCOO})]^-$ (**1**)**

A mixture of  $\text{Eu}_2\text{O}_3$  (0.0352 g, 0.1 mmol),  $\text{H}_2\text{L}$  (0.0996 g, 0.6 mmol), DMF (2 mL), methanol (2 mL) and  $\text{H}_2\text{O}$  (2 mL) was sealed in a Pyrex tube and heated in an oven at  $160^\circ\text{C}$  for 72 hours and then cooled slowly down to ambient at a rate of  $5^\circ\text{C}/\text{h}$ . Finally, colorless block-like crystals of **1** in yield of 75% were collected by filtration followed by washing with 3 portions of ethanol and drying. Elemental analysis (found/calcd: C% 36.43/36.51, H% 2.30/2.37, N% 1.62/1.58).

#### **Synthesis of $[(\text{CH}_3)_2\text{NH}_2]^+@[\text{Gd}_2\text{L}_3(\text{HCOO})]^-$ (**2**)**

A mixture of  $\text{Gd}_2\text{O}_3$  (0.0362 g, 0.1 mmol),  $\text{H}_2\text{L}$  (0.0996 g, 0.6 mmol), DMF (2 mL), methanol (2 mL) and  $\text{H}_2\text{O}$  (2 mL) in a Pyrex tube was heated in an oven at  $160^\circ\text{C}$  for 72 hours and then cooled slowly down to room temperature at a rate of  $5^\circ\text{C}/\text{h}$ . The colorless block-like crystals of **2** (yield: 71%) were collected by filtration followed by washing with ethanol for 3 times and drying. Elemental analysis (found/calcd: C% 36.12/36.08, H% 2.31/2.34, N% 1.58/1.56).

#### **Synthesis of $[(\text{CH}_3)_2\text{NH}_2]^+@[\text{Sm}_2\text{L}_3(\text{HCOO})]^-$ (**3**)**

The complex was prepared similarly to **1** and **2**, but using  $\text{Sm}_2\text{O}_3$  in the place of  $\text{Eu}_2\text{O}_3$  and  $\text{Gd}_2\text{O}_3$  and isolated in yield of 64%. Elemental

analysis (found/calcd: C% 36.42/36.58, H% 2.42/2.37, N% 1.59/1.58).

CCDC reference numbers: 981208 for **2** and 981209 for **3**.

### **Pyrolysis of $[(\text{CH}_3)_2\text{NH}_2]^+@[\text{Eu}_2\text{L}_3(\text{HCOO})^-]$**

The TGA curve of **1** (Fig. S1) shows the desertion temperatures of  $(\text{CH}_3)_2\text{NH}_2^+$  and  $\text{HCOO}^-$  in the range of 280-350°C and thus we ran the pyrolysis at 350°C. Powder of **1** was heated in a tube furnace (Hangzhou, SKC-5-12) for an hour under a nitrogen flow, and then **1-pyr** was attained after cooling down to room temperature. The PXRD spectrum of **1-pyr** (Fig. S3) confirms its crystallinity and microanalysis proves its composition as  $[\text{Eu}_2\text{L}_3]$  (ratio sum of  $[(\text{CH}_3)_2\text{NH}_2]^+$  and  $[\text{HCOO}]^-$ : found 10.45%, calcd 10.27%). Besides, its FT-IR spectrum (Fig. S2) shows no absorption of  $[(\text{CH}_3)_2\text{NH}_2]^+$  in the range of 2400 - 3200  $\text{cm}^{-1}$ .

### ***Crystal Structure Determination***

Suitable crystals of complexes were mounted with glue at the end of a glass fiber. Data collection was performed on an Agilent Technologies Gemini A System (Cu  $K\alpha$ ,  $\lambda = 1.54178 \text{ \AA}$ ) at room temperature (293 K). The data were processed using software *CrysAlisPro.1*. The structure was solved by direct methods and refined by full-matrix least-squares refinements based on  $F^2$ . Anisotropic thermal parameters were applied to all non-hydrogen atoms. The H atoms were generated geometrically. The crystallographic calculations were performed using *SHELXL-97*<sup>S1</sup> programs. The void volume of lattice with  $(\text{CH}_3)_2\text{NH}_2^+$  and  $\text{HCOO}^-$

removed) was calculated using the program *PLATON*<sup>S2</sup>. Crystal data and structure refinements are summarized in Table S1.

**Table S1** Crystal data and structure refinements for **1-3**.

| Complexes                                             | 1                                                                | 2                                                                | 3                                                                |
|-------------------------------------------------------|------------------------------------------------------------------|------------------------------------------------------------------|------------------------------------------------------------------|
| Chemical formula                                      | C <sub>27</sub> H <sub>21</sub> Eu <sub>2</sub> NO <sub>14</sub> | C <sub>27</sub> H <sub>21</sub> Gd <sub>2</sub> NO <sub>14</sub> | C <sub>27</sub> H <sub>21</sub> Sm <sub>2</sub> NO <sub>14</sub> |
| Formula weight                                        | 887.39                                                           | 897.95                                                           | 884.17                                                           |
| crystal system                                        | Triclinic                                                        | Triclinic                                                        | Triclinic                                                        |
| space group                                           | <i>P-1</i>                                                       | <i>P-1</i>                                                       | <i>P-1</i>                                                       |
| <i>a</i> (Å)                                          | 8.38836(17)                                                      | 8.3576(2)                                                        | 8.3911(2)                                                        |
| <i>b</i> (Å)                                          | 10.5219(4)                                                       | 10.5283(4)                                                       | 10.5518(3)                                                       |
| <i>c</i> (Å)                                          | 17.3863(7)                                                       | 17.4675(6)                                                       | 17.4632(5)                                                       |
| <i>α</i> (deg)                                        | 99.169(4)                                                        | 98.741(3)                                                        | 98.993(3)                                                        |
| <i>β</i> (deg)                                        | 97.140(3)                                                        | 97.008(3)                                                        | 97.112(2)                                                        |
| <i>γ</i> (deg)                                        | 100.332(3)                                                       | 100.523(3)                                                       | 100.424(3)                                                       |
| <i>V</i> (Å <sup>3</sup> )                            | 1471.79(9)                                                       | 1475.75(9)                                                       | 1483.48(7)                                                       |
| <i>Z</i>                                              | 2                                                                | 2                                                                | 2                                                                |
| <i>D</i> <sub>calcd</sub> (g cm <sup>-3</sup> )       | 2.002                                                            | 2.021                                                            | 1.979                                                            |
| <i>μ</i> (mm <sup>-1</sup> )                          | 4.294                                                            | 4.526                                                            | 3.990                                                            |
| Ref. collected                                        | 12827                                                            | 11570                                                            | 13786                                                            |
| Independent ref.                                      | 5982                                                             | 5189                                                             | 5219                                                             |
| <i>R</i> <sub>int</sub>                               | 0.0351                                                           | 0.0348                                                           | 0.0259                                                           |
| Goodness of fit                                       | 1.038                                                            | 1.008                                                            | 1.054                                                            |
| <i>R</i> 1 <sup>a</sup> [ <i>I</i> > 2σ( <i>I</i> )]  | 0.0312                                                           | 0.0262                                                           | 0.0206                                                           |
| <i>wR</i> 2 <sup>b</sup> [ <i>I</i> > 2σ( <i>I</i> )] | 0.0716                                                           | 0.0523                                                           | 0.0428                                                           |
| <i>R</i> 1 <sup>a</sup> [all refl.]                   | 0.0395                                                           | 0.0325                                                           | 0.0270                                                           |
| <i>wR</i> 2 <sup>b</sup> [all refl.]                  | 0.0772                                                           | 0.0558                                                           | 0.0448                                                           |

$$^a R_1 = \sum(|F_0| - |F_c|) / \sum|F_0|; \quad ^b wR_2 = [\sum w(F_0^2 - F_c^2)^2 / \sum w(F_0^2)^2]^{1/2}$$

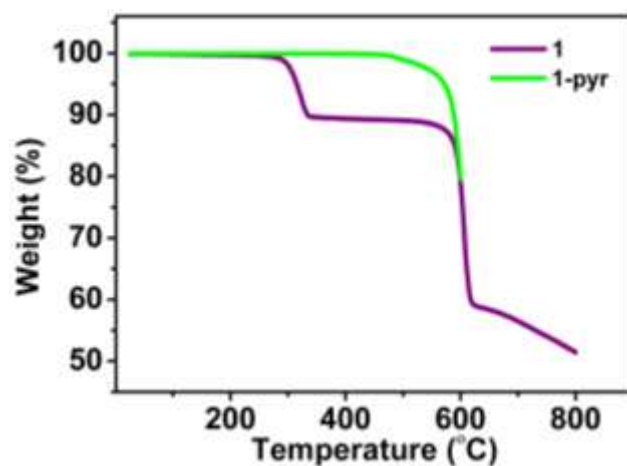

**Fig. S1** TGA curves for **1** (black) and **1-pyr** (red).

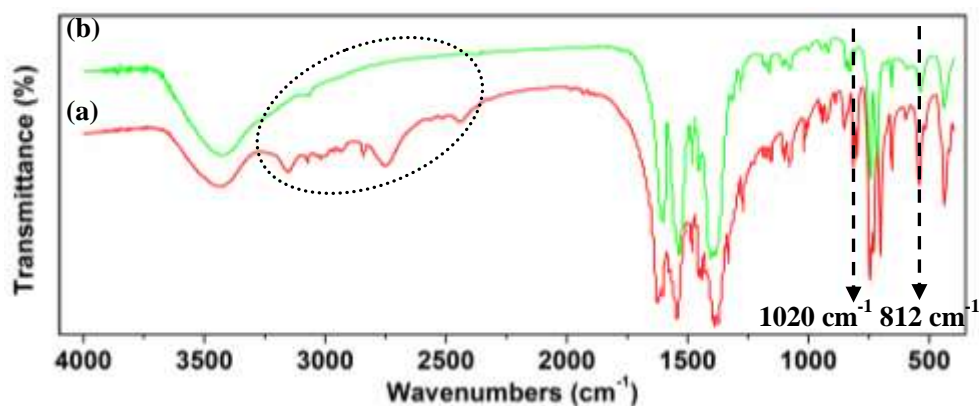

**Fig. S2** Infrared spectra for **1** (a) and **1-pyr** (b).

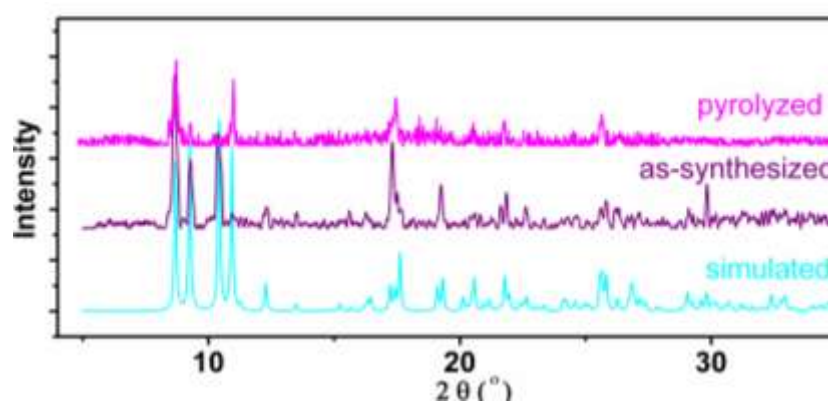

**Fig. S3** The simulated and measured PXRD spectra for **1** (below) and **1-pyr** (middle) and that for **1-pyr** (upper).

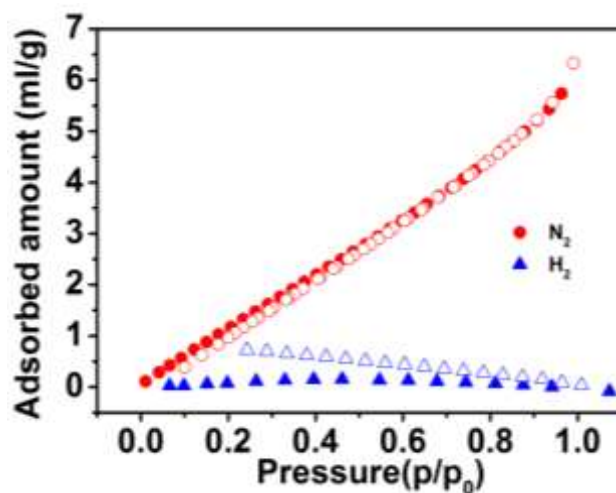

**Fig. S4** N<sub>2</sub> and H<sub>2</sub> adsorption and desorption isotherms for **1** at 77K.

### *Fitting of Adsorption Isotherms*

To have an insight into the nature of selective adsorption of **1-pyr**, we fit the CO<sub>2</sub> and N<sub>2</sub> adsorption isotherms by two models: i) just fit linear for the initial slopes (**Fig. S5**) and ii) single-site Langmuir (SSL) model.

The model equation is:

$$q = \frac{q_{sat}bp}{1+bp}$$

where  $q$  is the adsorption quantity,  $q_{sat}$  is the saturate adsorption quantity,  $b$  is the coefficients of Langmuir equation.

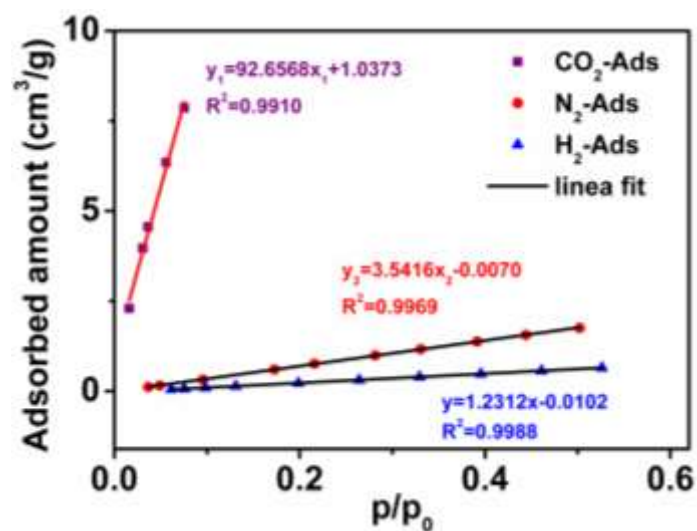

(a)

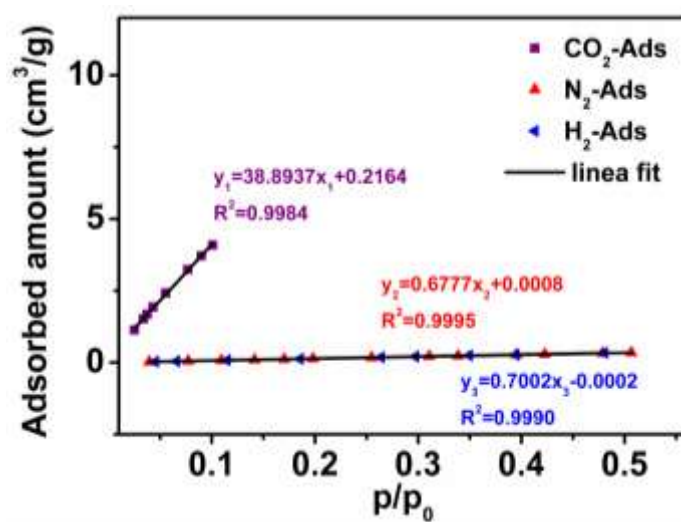

(b)

**Fig. S5** The initial slopes for CO<sub>2</sub>, N<sub>2</sub> and H<sub>2</sub> isotherms of **1-pyr** at 273 K

(a) and 298 K (b).

**Table S2** Gas adsorption performance of similar MOFs constructed from meta-benzenedicarboxylate units.

| MOFs             | Selectivity <sup>a</sup> | Selectivity <sup>b</sup> | S <sub>BET</sub> <sup>c</sup> (m <sup>2</sup> /g <sup>-1</sup> ) | CO <sub>2</sub> <sup>d</sup> (wt%) | Reference        |
|------------------|--------------------------|--------------------------|------------------------------------------------------------------|------------------------------------|------------------|
| <i>1-pyr</i>     | 57.4                     | 72.5                     | 124                                                              | 3.6                                | <i>this work</i> |
| <b>HNUST-1</b>   | 39.8(273K)               | NA                       | 1400                                                             | 30.7                               | S3               |
| <b>MOF-177</b>   | 17.73                    | NA                       | 4690                                                             | 26.59                              | S4               |
| <b>Cu-TDPAT</b>  | 16                       | 79                       | 1938                                                             | 6.2                                | S5               |
| <b>NOTT-122a</b> | 14.3                     | NA                       | 3286                                                             | 20.4                               | S6               |
| <b>MOF-74-Mg</b> | 12                       | NA                       | 1495                                                             | 35.2                               | S7               |
| <b>MMPF</b>      | NA                       | 123(273K)                | 1205                                                             | 13.2                               | S8               |
| <b>PCN-306</b>   | NA                       | 40                       | 1927                                                             | 13.8                               | S9               |
| <b>PCN-61</b>    | NA                       | 15                       | 3350                                                             | NA                                 | S10              |

NA, not available. <sup>a</sup>Selectivity calculated from the initial slopes of the isotherms at 298 K and 1 atm. <sup>b</sup> CO<sub>2</sub>/N<sub>2</sub> (15 : 85) selectivity at 1 atm and 298 K calculated from Ideal Adsorbed Solution Theory (IAST). <sup>c</sup> Brunauer–Emmett–Teller (BET) surface area. <sup>d</sup> CO<sub>2</sub> uptake capacity at 298 K and 1 atm.

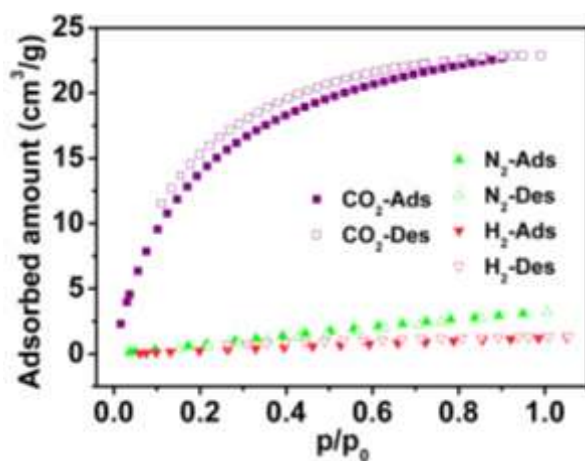

**Fig. S6** Adsorption and desorption isotherms of **1-pyr** on CO<sub>2</sub>, N<sub>2</sub> and H<sub>2</sub> at 273K.



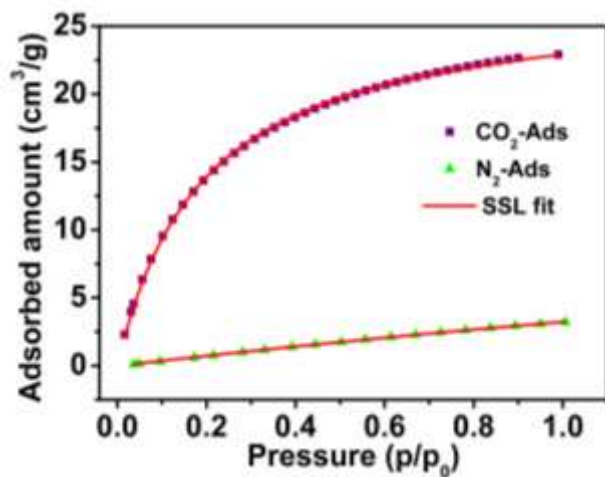

(a)

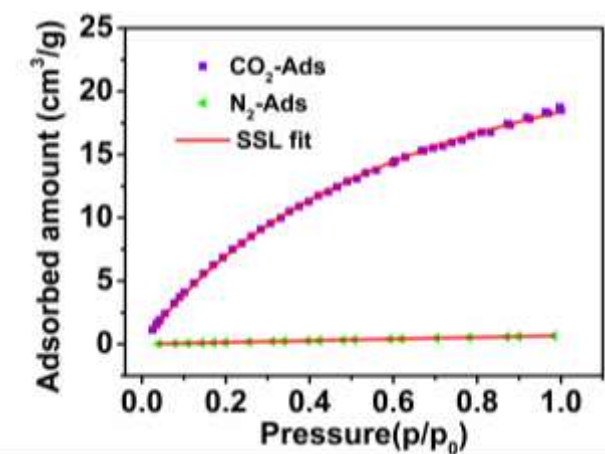

(b)

**Fig. S7** The SSL fitting for the CO<sub>2</sub> and N<sub>2</sub> adsorption isotherms of **1-pyr** at 273K (a) and 298K (b).

**Table S3** Single site Langmuir fitting parameters for CO<sub>2</sub> and N<sub>2</sub> adsorption at 273K and 298K.

| CO <sub>2</sub>  | 273K                         | 298K                         |
|------------------|------------------------------|------------------------------|
| $q_{\text{sat}}$ | 27.352                       | 31.188                       |
| $b$              | 5.172                        | 1.438                        |
| $R^2$            | 0.99960                      | 0.99953                      |
| Equation         | $y=27.352*5.172x/(1+5.172x)$ | $y=31.188*1.438x/(1+1.438x)$ |

| N <sub>2</sub>   | 273K                         | 298K                         |
|------------------|------------------------------|------------------------------|
| $q_{\text{sat}}$ | 22.414                       | 16.950                       |
| $b$              | 0.169                        | 0.040                        |
| $R^2$            | 0.99957                      | 0.99988                      |
| Equation         | $y=22.414*0.169x/(1+0.169x)$ | $y=16.950*0.040x/(1+0.040x)$ |

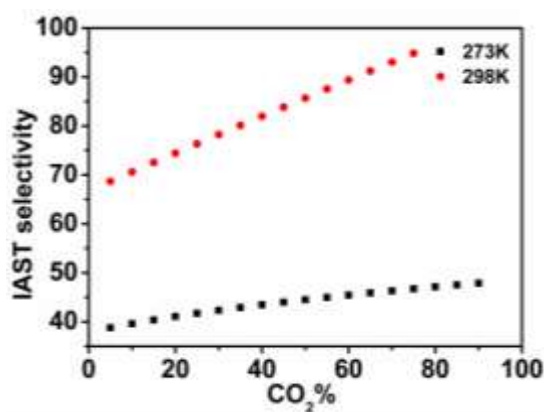

**Fig. S8** The predicted IAST selectivity of CO<sub>2</sub>/N<sub>2</sub> at 273 K and 298 K for **1-pyr**, showing the relation between IAST selectivity and various percentage of CO<sub>2</sub> in the two component mixture.

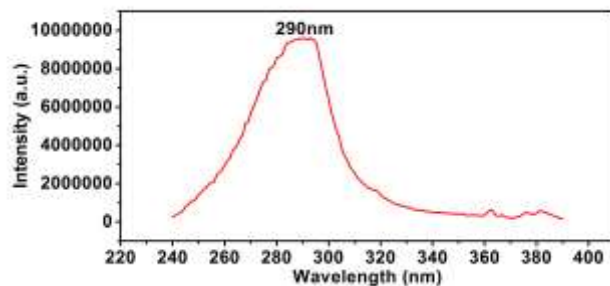

(a)

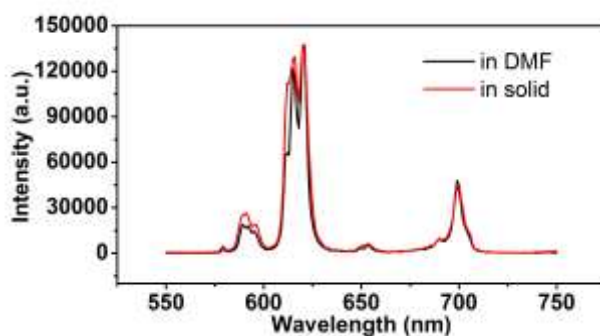

(b)

**Fig. S9** The solid-state (a) excitation (monitored at 620 nm) and (b) emission (excited at 290 nm) spectra in DMF solution (black) or in solid state (red) of **1-pyr** at room temperature.

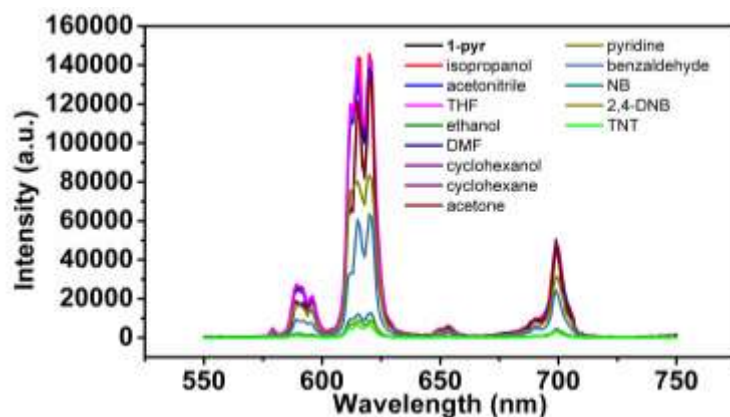

**Fig. S10** Emission spectra of **1-pyr** in DMF emulsions with the addition of 5mM different solvents, monitored and excited at 620nm and 290nm, respectively.

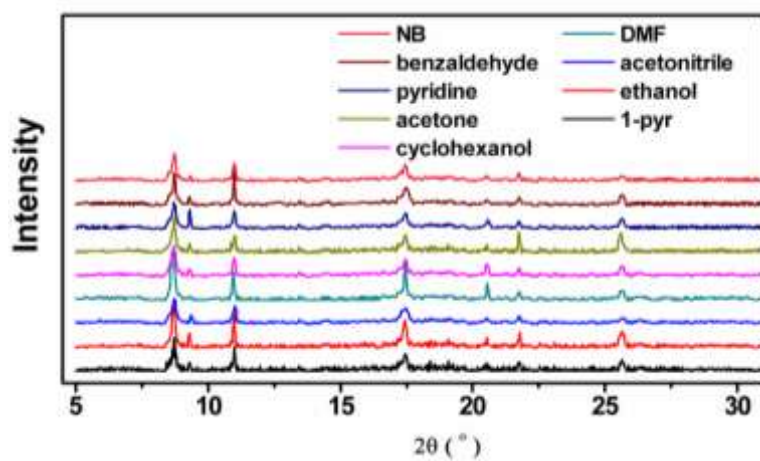

**Fig. S11** Comparison of PXRD patterns of **1-pyr** dispersed in different solvents.

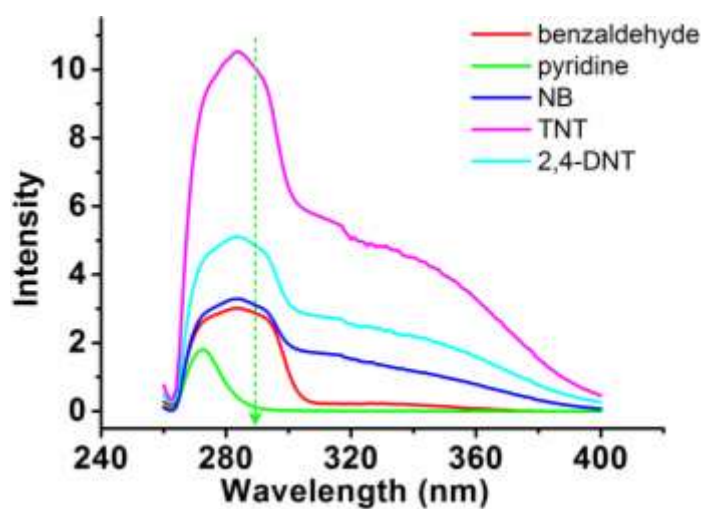

**Fig. S12** UV-Vis absorbance spectra of 5mM aromatic compounds dissolved in DMF solution.

- 
- S1 G. M. Sheldrick, *Acta Crystallographica. A*, 2007, **64**, 112.
- S2 A. Spek, *J. Appl. Crystallogr.*, 2003, **36**, 7.
- S3 B. Zheng, H. Liu, Z. Wang, X. Yu, P. Yi and J. Bai, *CrystEngComm*, 2013, **15**, 3517.
- S4 D. Saha, Z. Bao, F. Jia and S. Deng, *Environ. Sci. Technol.*, 2010, **44**, 1820.
- S5 B. Li, Z. Zhang, Y. Li, K. Yao, Y. Zhu, Z. Deng, F. Yang, X. Zhou, G. Li, H. Wu, N. Nijem, Y. J. Chabal, Z. Lai, Y. Han, Z. Shi, S. Feng and J. Li, *Angewandte Chemie-International Edition*, 2012, **51**, 1412.
- S6 Y. Yan, M. Suyetin, E. Bichoutskaia, A. J. Blake, D. R. Allan, S. A. Barnett and M. Schröder, *Chemical Science*, 2013, **4**, 1731.
- S7 S. R. Caskey, A. G. Wong-Foy and A. J. Matzger, *J. Am. Chem. Soc.*, 2008, **130**, 10870.
- S8 X.-S. Wang, M. Chrzanowski, W.-Y. Gao, L. Wojtas, Y.-S. Chen, M. J. Zaworotko and S. Ma, *Chemical Science*, 2012, **3**, 2823.
- S9 Y. Liu, J.-R. Li, W. M. Verdegaal, T.-F. Liu and H.-C. Zhou, *Chemistry - A European Journal*, 2013, **19**, 5637.
- S10 B. Zheng, J. Bai, J. Duan, L. Wojtas and M. J. Zaworotko, *J. Am. Chem. Soc.*, 2011, **133**, 748.
